# Supplementary material for: Development and validation of a short version of the Sarcopenia Quality of Life questionnaire: the SF-SarQoL
Source: PubMed Central journal article supplement (PMC8298237; doi:10.1007/s11136-021-02823-3), 2021-03-30
Supplement: 11136_2021_2823_MOESM1_ESM.pdf [file 11136_2021_2823_MOESM1_ESM.pdf]

### Quality of life in sarcopenia

This questionnaire asks about **sarcopenia**, which is a **muscle weakness that comes about with ageing**. Sarcopenia can affect your daily life. This survey will enable us to find out if the state of your muscles currently **affects your quality of life**.

Please choose the **most appropriate response** for each question. The questionnaire should take you approximately 5 minutes to complete.

#### 1. Do you currently feel you have a reduction in:

|                             | A lot                    | Some                     | A little                 | None                     |
|-----------------------------|--------------------------|--------------------------|--------------------------|--------------------------|
| The strength in your arms?  | <input type="checkbox"/> | <input type="checkbox"/> | <input type="checkbox"/> | <input type="checkbox"/> |
| The strength in your legs?  | <input type="checkbox"/> | <input type="checkbox"/> | <input type="checkbox"/> | <input type="checkbox"/> |
| Your muscle mass?           | <input type="checkbox"/> | <input type="checkbox"/> | <input type="checkbox"/> | <input type="checkbox"/> |
| Your physical capabilities? | <input type="checkbox"/> | <input type="checkbox"/> | <input type="checkbox"/> | <input type="checkbox"/> |
| The distance you can walk?  | <input type="checkbox"/> | <input type="checkbox"/> | <input type="checkbox"/> | <input type="checkbox"/> |

#### 2. When undertaking moderate physical activities (fast walking, cleaning windows, hoovering, washing the car, pulling up weeds in the garden, etc.), do you:

|                  | Often                    | Occasionally             | Rarely                   | Never                    | I do not undertake these types of physical activities |
|------------------|--------------------------|--------------------------|--------------------------|--------------------------|-------------------------------------------------------|
| Have difficulty? | <input type="checkbox"/> | <input type="checkbox"/> | <input type="checkbox"/> | <input type="checkbox"/> | <input type="checkbox"/>                              |
| Get tired?       | <input type="checkbox"/> | <input type="checkbox"/> | <input type="checkbox"/> | <input type="checkbox"/> | <input type="checkbox"/>                              |

#### 3. Do you currently have difficulty in undertaking any of the following activities:

|                                                                                         | Unable to do             | Great difficulty         | A little difficulty      | No difficulty            | Not applicable           |
|-----------------------------------------------------------------------------------------|--------------------------|--------------------------|--------------------------|--------------------------|--------------------------|
| Getting up from the floor without holding on to anything?                               | <input type="checkbox"/> | <input type="checkbox"/> | <input type="checkbox"/> | <input type="checkbox"/> | <input type="checkbox"/> |
| Carrying heavy objects (large bags full of shopping, saucepan filled with water, etc.)? | <input type="checkbox"/> | <input type="checkbox"/> | <input type="checkbox"/> | <input type="checkbox"/> | <input type="checkbox"/> |

4. When you are walking, do you feel very tired?

|                          |                          |                          |                          |                          |
|--------------------------|--------------------------|--------------------------|--------------------------|--------------------------|
| Often                    | Occasionally             | Rarely                   | Never                    | I am unable to walk      |
| <input type="checkbox"/> | <input type="checkbox"/> | <input type="checkbox"/> | <input type="checkbox"/> | <input type="checkbox"/> |

5. Do you feel physically weak?

|                          |                          |                          |                          |
|--------------------------|--------------------------|--------------------------|--------------------------|
| Yes, completely          | Yes, somewhat            | Yes, a little            | No, not at all           |
| <input type="checkbox"/> | <input type="checkbox"/> | <input type="checkbox"/> | <input type="checkbox"/> |

6. Do you have problems with your balance?

|                          |                          |                          |                          |
|--------------------------|--------------------------|--------------------------|--------------------------|
| Often                    | Occasionally             | Rarely                   | Never                    |
| <input type="checkbox"/> | <input type="checkbox"/> | <input type="checkbox"/> | <input type="checkbox"/> |

7. Does your muscle weakness limit your movement?

|                          |                          |                          |                          |
|--------------------------|--------------------------|--------------------------|--------------------------|
| Yes, a lot               | Yes, somewhat            | Yes, a little            | No, not at all           |
| <input type="checkbox"/> | <input type="checkbox"/> | <input type="checkbox"/> | <input type="checkbox"/> |

8. Has your participation in leisure activities (going out to eat, gardening, doing DIY, shooting/fishing, senior citizens clubs, playing bridge, going for a walk, etc.) changed?

|                          |                          |                          |                                                 |
|--------------------------|--------------------------|--------------------------|-------------------------------------------------|
| Increased                | Decreased                | Unchanged                | I have never participated in leisure activities |
| <input type="checkbox"/> | <input type="checkbox"/> | <input type="checkbox"/> | <input type="checkbox"/>                        |
